# Supplementary material for: Reversible single-crystal-to-single-crystal transition in Gd(iii) metal–organic frameworks induced by heat and solvents with a significant magnetocaloric effect
Source: Royal Society of Chemistry journal article supplement (doi:10.1039/d3dt03867j), 2024-01-01
Supplement: d3dt03867j1.pdf [file d3dt03867j1.pdf]

## ***Electronic Supplementary Information (ESI)***

**Reversible single-crystal-to-single-crystal transition in  
Gd(III) metal-organic frameworks induced by heat and  
solvents with a significant magnetocaloric effect**

**Jin-Jin Wang, Yu Li, Teng-Fei Zheng,\* Yan Peng, Jing-Lin Chen, Sui-Jun Liu\*  
and He-Rui Wen**

School of Chemistry and Chemical Engineering, Jiangxi Provincial Key Laboratory  
of Functional Molecular Materials Chemistry, Jiangxi University of Science and  
Technology, Ganzhou 341000, Jiangxi Province, P.R. China

E-mail: sjliu@jxust.edu.cn (S.-J. Liu), zhengtengfei0628@163.com (T.-F. Zheng)

## Materials and instrumentations

All chemical reagents were obtained from commercial sources and used without further purification. The powder X-ray diffraction (PXRD) patterns were recorded by Rigaku MiniFlex 600. The simulated PXRD patterns of single-crystal data were obtained using the Mercury software, which are freely available on the Internet at <http://www.iucr.org>. Thermogravimetric analysis (TGA) was performed under a N<sub>2</sub> flow at a heating rate of 10 °C min<sup>-1</sup> from 25 to 1000 °C on a NETZSCH STA2500 thermal analyzer. IR spectra in the range of 4000–400 cm<sup>-1</sup> were collected with KBr particles on a Bruker Alpha FT-IR spectrometer. Elemental analysis (C, H, and N) was performed on a vario EL cube elemental analyzer. Magnetic data were collected by a Quantum Design MPMS-XL-7 SQUID magnetometer. Diamagnetic corrections were estimated by employing Pascal constants and background corrections by experimental measurement on sample holders. DC magnetic susceptibilities were measured in temperature range of 2-300 K under a 0.1 T dc field. The plots of *M* vs *H* for **JXUST-41** and **JXUST-41a** were recorded at 2 K under the fields between 0 and 7 T. While for **JXUST-40** and **JXUST-40a**, *M* vs *H* plots were measured at the temperature range of 2-10 K under the field of 0-7 T. AC susceptibilities were performed at 2-12 K (2-7 K, 0.25 K per step; 7-12 K, 1 K per step) under a 2 kOe dc field and 3 Oe oscillating ac field.

## Crystallographic studies for **JXUST-40**, **JXUST-40a**, **JXUST-40b**, **JXUST-41**, **JXUST-41a** and **JXUST-41b**

Single crystal X-ray diffraction data of **JXUST-40**, **JXUST-40a**, **JXUST-40b**, **JXUST-41**, **JXUST-41a** and **JXUST-41b** were recorded on a Bruker D8 QUEST diffractometer Mo-K $\alpha$  radiation ( $\lambda = 0.71073 \text{ \AA}$ ) by  $\omega$  scan mode. SAINT program was used for diffraction profile integration.<sup>S1</sup> The SHELXT program of SHELXTL software package was used to solve the structure directly, and the full matrix least square method was used to refine the structure.<sup>S2</sup> The non-hydrogen atoms were situated in successive difference Fourier syntheses and refined by anisotropic thermal parameters on *F*<sup>2</sup>. Theoretically, the hydrogen atoms of BTDI<sup>4-</sup> ligands are formed on specific atoms, and isotropic refinement was carried out by a fixed thermal factor. The

program SQUEEZE,<sup>S3</sup> a part of the PLATON package of crystallographic software, was used to calculate the solvent-accessible area and remove their contributions to the overall intensity data. A solvent mask during SQUEEZE process are six water molecules for **JXUST-40a** and **JXUST-41a** based on elemental analysis and TGA. The crystal structures have been deposited at the Cambridge Crystallographic Data Center (CCDC) and allocated the deposition numbers: 230884 (**JXUST-40** at 273 K), 230885 (**JXUST-40a** at 293 K), 230886 (**JXUST-40b** at 273 K), 230887 (**JXUST-41** at 273 K), 230888 (**JXUST-41** at 293 K), 230889 (**JXUST-41b** at 273 K). A summary of the crystallographic data and refinement parameters is given in Tables S1 and S2.

## References

- S1 *SAINT, Version 6.02a*, Bruker AXS Inc, Madison, WI, 2002.
- S2 G. M. Sheldrick, *Acta Crystallogr. Sect. A: Found. Adv.*, 2015, **A71**, 3-8.
- S3 A. L. Spek, *Acta Crystallogr. Sect. D-Biol. Crystallogr.* 2009, **65**, 148–155

**Table S1.** Crystal data and structure refinements for **JXUST-40**, **JXUST-40a** and **JXUST-40b**

| Compound                                                                                                       | <b>JXUST-40</b>                                                                                | <b>JXUST-40a</b>                                                                              | <b>JXUST-40b</b>                                                                               |
|----------------------------------------------------------------------------------------------------------------|------------------------------------------------------------------------------------------------|-----------------------------------------------------------------------------------------------|------------------------------------------------------------------------------------------------|
| formula                                                                                                        | C <sub>78</sub> H <sub>52</sub> N <sub>10</sub> O <sub>28</sub> S <sub>3</sub> Gd <sub>4</sub> | C <sub>66</sub> H <sub>44</sub> N <sub>6</sub> O <sub>34</sub> S <sub>3</sub> Gd <sub>4</sub> | C <sub>78</sub> H <sub>52</sub> N <sub>10</sub> O <sub>28</sub> S <sub>3</sub> Gd <sub>4</sub> |
| <i>Mr</i>                                                                                                      | 2302.47                                                                                        | 2190.25                                                                                       | 2302.47                                                                                        |
| <i>T</i> (K)                                                                                                   | 273(2)                                                                                         | 293(2)                                                                                        | 273(2)                                                                                         |
| crystal system                                                                                                 | triclinic                                                                                      | triclinic                                                                                     | triclinic                                                                                      |
| space group                                                                                                    | <i>P</i> $\bar{1}$                                                                             | <i>P</i> $\bar{1}$                                                                            | <i>P</i> $\bar{1}$                                                                             |
| <i>a</i> (Å)                                                                                                   | 10.9770(6)                                                                                     | 11.0108(10)                                                                                   | 10.9670(6)                                                                                     |
| <i>b</i> (Å)                                                                                                   | 11.9536(7)                                                                                     | 11.1168(10)                                                                                   | 11.1536(7)                                                                                     |
| <i>c</i> (Å)                                                                                                   | 15.8824(10)                                                                                    | 15.8231(14)                                                                                   | 15.9824(10)                                                                                    |
| $\alpha$ (°)                                                                                                   | 73.776(2)                                                                                      | 104.973(3)                                                                                    | 73.676(2)                                                                                      |
| $\beta$ (°)                                                                                                    | 70.816(2)                                                                                      | 109.460(3)                                                                                    | 71.786(2)                                                                                      |
| $\gamma$ (°)                                                                                                   | 86.974(2)                                                                                      | 90.221(3)                                                                                     | 86.984(2)                                                                                      |
| <i>V</i> (Å <sup>3</sup> )                                                                                     | 1888.20(19)                                                                                    | 1755.6(3)                                                                                     | 1780.85(19)                                                                                    |
| <i>Z</i>                                                                                                       | 1                                                                                              | 1                                                                                             | 1                                                                                              |
| <i>F</i> (000)                                                                                                 | 1118                                                                                           | 1058                                                                                          | 1118                                                                                           |
| <i>D</i> <sub>calc</sub> (g cm <sup>-3</sup> )                                                                 | 2.025                                                                                          | 2.072                                                                                         | 2.147                                                                                          |
| $\mu$ (mm <sup>-1</sup> )                                                                                      | 3.645                                                                                          | 3.919                                                                                         | 3.865                                                                                          |
| Collected reflections                                                                                          | 23531                                                                                          | 19408                                                                                         | 22729                                                                                          |
| Unique reflections                                                                                             | 6575                                                                                           | 6112                                                                                          | 6234                                                                                           |
| <i>R</i> <sub>int</sub>                                                                                        | 0.0538                                                                                         | 0.0685                                                                                        | 0.0514                                                                                         |
| <i>R</i> <sub>1</sub> <sup>a</sup> / <i>wR</i> <sub>2</sub> <sup>b</sup> [ <i>I</i> > 2 $\sigma$ ( <i>I</i> )] | 0.0375/0.0646                                                                                  | 0.0634/0.1454                                                                                 | 0.0343/0.0616                                                                                  |
| <i>R</i> <sub>1</sub> <sup>a</sup> / <i>wR</i> <sub>2</sub> <sup>b</sup> (all data)                            | 0.0618/0.0735                                                                                  | 0.1044/0.1612                                                                                 | 0.0568/0.0691                                                                                  |
| GOF on <i>F</i> <sup>2</sup>                                                                                   | 1.036                                                                                          | 1.065                                                                                         | 1.025                                                                                          |

$$^aR_1 = \Sigma(|F_0| - |F_C|)/\Sigma|F_0|. \quad ^b wR_2 = [\Sigma w(|F_0|^2 - |F_C|^2)^2 / (\Sigma w|F_0|^2)^2]^{1/2}.$$

**Table S2.** Crystal data and structure refinements for **JXUST-41**, **JXUST-41a** and **JXUST-41b**

| Compound                                                                                                       | <b>JXUST-41</b>                                                                                | <b>JXUST-41a</b>                                                                              | <b>JXUST-41b</b>                                                                               |
|----------------------------------------------------------------------------------------------------------------|------------------------------------------------------------------------------------------------|-----------------------------------------------------------------------------------------------|------------------------------------------------------------------------------------------------|
| formula                                                                                                        | C <sub>78</sub> H <sub>52</sub> N <sub>10</sub> O <sub>28</sub> S <sub>3</sub> Dy <sub>4</sub> | C <sub>66</sub> H <sub>44</sub> N <sub>6</sub> O <sub>34</sub> S <sub>3</sub> Dy <sub>4</sub> | C <sub>78</sub> H <sub>52</sub> N <sub>10</sub> O <sub>28</sub> S <sub>3</sub> Dy <sub>4</sub> |
| <i>Mr</i>                                                                                                      | 2323.47                                                                                        | 2211.28                                                                                       | 2323.47                                                                                        |
| <i>T</i> (K)                                                                                                   | 273(2)                                                                                         | 293(2)                                                                                        | 273(2)                                                                                         |
| crystal system                                                                                                 | triclinic                                                                                      | triclinic                                                                                     | triclinic                                                                                      |
| space group                                                                                                    | <i>P</i> $\bar{1}$                                                                             | <i>P</i> $\bar{1}$                                                                            | <i>P</i> $\bar{1}$                                                                             |
| <i>a</i> (Å)                                                                                                   | 10.9183(5)                                                                                     | 10.9980 (12)                                                                                  | 10.9883(5)                                                                                     |
| <i>b</i> (Å)                                                                                                   | 12.0025(6)                                                                                     | 11.1805(13)                                                                                   | 12.5025(6)                                                                                     |
| <i>c</i> (Å)                                                                                                   | 15.8371(6)                                                                                     | 15.8136(17)                                                                                   | 15.4371(6)                                                                                     |
| $\alpha$ (°)                                                                                                   | 73.454(10)                                                                                     | 104.902(4)                                                                                    | 73.354(10)                                                                                     |
| $\beta$ (°)                                                                                                    | 70.816(10)                                                                                     | 109.430(3)                                                                                    | 70.616(10)                                                                                     |
| $\gamma$ (°)                                                                                                   | 86.911(10)                                                                                     | 90.228(4)                                                                                     | 86.511(10)                                                                                     |
| <i>V</i> (Å <sup>3</sup> )                                                                                     | 1877.18(15)                                                                                    | 1763.5(3)                                                                                     | 1915.34(15)                                                                                    |
| <i>Z</i>                                                                                                       | 1                                                                                              | 1                                                                                             | 1                                                                                              |
| <i>F</i> (000)                                                                                                 | 1126                                                                                           | 1066                                                                                          | 1126                                                                                           |
| <i>D</i> <sub>calc</sub> (g cm <sup>-3</sup> )                                                                 | 2.055                                                                                          | 2.082                                                                                         | 2.014                                                                                          |
| $\mu$ (mm <sup>-1</sup> )                                                                                      | 4.114                                                                                          | 4.378                                                                                         | 4.032                                                                                          |
| Collected reflections                                                                                          | 23053                                                                                          | 18642                                                                                         | 23480                                                                                          |
| Unique reflections                                                                                             | 6546                                                                                           | 6110                                                                                          | 6703                                                                                           |
| <i>R</i> <sub>int</sub>                                                                                        | 0.0265                                                                                         | 0.0615                                                                                        | 0.0269                                                                                         |
| <i>R</i> <sub>1</sub> <sup>a</sup> / <i>wR</i> <sub>2</sub> <sup>b</sup> [ <i>I</i> > 2 $\sigma$ ( <i>I</i> )] | 0.0244/0.0491                                                                                  | 0.0657/0.1406                                                                                 | 0.0293/0.0685                                                                                  |
| <i>R</i> <sub>1</sub> <sup>a</sup> / <i>wR</i> <sub>2</sub> <sup>b</sup> (all data)                            | 0.0307/0.0511                                                                                  | 0.1014/0.1619                                                                                 | 0.0358/0.0711                                                                                  |
| GOF on <i>F</i> <sup>2</sup>                                                                                   | 1.067                                                                                          | 1.052                                                                                         | 1.091                                                                                          |

$${}^aR_1 = \Sigma(|F_0| - |F_C|)/\Sigma|F_0|. \quad {}^b wR_2 = [\Sigma w(|F_0|^2 - |F_C|^2)^2 / (\Sigma w|F_0|^2)^2]^{1/2}.$$

**Table S3.** Selected bond lengths (Å) and angles (°) for **JXUST-40<sup>a</sup>**

|                                       |            |                                         |            |
|---------------------------------------|------------|-----------------------------------------|------------|
| Gd1—O1                                | 2.299(5)   | Gd2—O13                                 | 2.340(5)   |
| Gd1—O5 <sup>i</sup>                   | 2.263(11)  | Gd2—O6A <sup>ii</sup>                   | 2.230(19)  |
| Gd1—O7 <sup>ii</sup>                  | 2.450(4)   | Gd2—O2 <sup>iii</sup>                   | 2.304(4)   |
| Gd1—O8 <sup>ii</sup>                  | 2.422(4)   | Gd2—O3                                  | 2.454(4)   |
| Gd1—O11                               | 2.434(14)  | Gd2—O4                                  | 2.373(4)   |
| Gd1—O12                               | 2.367(5)   | Gd2—O6 <sup>ii</sup>                    | 2.350(18)  |
| Gd1—O14                               | 2.412(6)   | O5 <sup>i</sup> —Gd1—O14                | 84.5(7)    |
| O1—Gd1—O7 <sup>ii</sup>               | 77.40(17)  | O8 <sup>ii</sup> —Gd1—O7 <sup>ii</sup>  | 53.26(15)  |
| O1—Gd1—O8 <sup>ii</sup>               | 103.87(17) | O8 <sup>ii</sup> —Gd1—O11               | 116.7(4)   |
| O1—Gd1—O11                            | 98.9(5)    | O11—Gd1—O7 <sup>ii</sup>                | 76.4(5)    |
| O1—Gd1—O12                            | 158.3(2)   | O12—Gd1—O7 <sup>ii</sup>                | 118.24(16) |
| O1—Gd1—O14                            | 84.1(2)    | O12—Gd1—O8 <sup>ii</sup>                | 77.84(16)  |
| O5 <sup>i</sup> —Gd1—O1               | 87.2(5)    | O12—Gd1—O11                             | 99.5(6)    |
| O5 <sup>i</sup> —Gd1—O7 <sup>ii</sup> | 147.2(6)   | O12—Gd1—O14                             | 74.8(2)    |
| O5 <sup>i</sup> —Gd1—O8 <sup>ii</sup> | 159.5(5)   | O14—Gd1—O7 <sup>ii</sup>                | 121.7(2)   |
| O5 <sup>i</sup> —Gd1—O11              | 77.7(8)    | O14—Gd1—O8 <sup>ii</sup>                | 79.58(19)  |
| O5 <sup>i</sup> —Gd1—O12              | 85.6(5)    | O14—Gd1—O11                             | 161.7(5)   |
| O6 <sup>ii</sup> —Gd2—O4              | 114.5(5)   | O2 <sup>iii</sup> —Gd2—O3               | 145.10(16) |
| O13—Gd2—O3                            | 80.65(17)  | O2 <sup>iii</sup> —Gd2—O4               | 158.69(16) |
| O13—Gd2—O4                            | 105.17(18) | O2 <sup>iii</sup> —Gd2—O6 <sup>ii</sup> | 85.2(5)    |
| O13—Gd2—O6 <sup>ii</sup>              | 104.1(5)   | O2 <sup>iii</sup> —Gd2—O13              | 75.75(17)  |
| O4—Gd2—O3                             | 53.45(15)  | O6 <sup>ii</sup> —Gd2—O3                | 76.0(5)    |

<sup>a</sup>Symmetry codes: (i)  $x, y, z+1$ ; (ii)  $x-1, y, z+1$ ; (iii)  $x-1, y, z$ ; (iv)  $x+1, y, z-1$ .

**Table S4.** Selected bond lengths (Å) and angles (°) for **JXUST-40a<sup>b</sup>**

|                                         |           |                                          |           |
|-----------------------------------------|-----------|------------------------------------------|-----------|
| Gd1—O1                                  | 2.38(3)   | Gd1—O10 <sup>i</sup>                     | 2.371(9)  |
| Gd1—O1W                                 | 2.277(8)  | Gd1—O11 <sup>ii</sup>                    | 2.276(8)  |
| Gd1—O5                                  | 2.264(10) | Gd2—O2W                                  | 2.309(8)  |
| Gd1—O9 <sup>i</sup>                     | 2.498(9)  | Gd2—O7 <sup>ii</sup>                     | 2.455(8)  |
| Gd2—O3                                  | 2.59(4)   | Gd2—O8 <sup>ii</sup>                     | 2.410(10) |
| Gd2—O4                                  | 2.48(2)   | Gd2—O12 <sup>iii</sup>                   | 2.241(8)  |
| Gd2—O6 <sup>i</sup>                     | 2.234(8)  | O1W—Gd1—O1                               | 78.4(7)   |
| O1W—Gd1—O9 <sup>i</sup>                 | 79.2(4)   | O1—Gd1—O9 <sup>i</sup>                   | 111.8(8)  |
| O1W—Gd1—O10 <sup>i</sup>                | 107.4(4)  | O5—Gd1—O1                                | 170.1(8)  |
| O5—Gd1—O9 <sup>i</sup>                  | 73.7(3)   | O5—Gd1—O1W                               | 95.0(4)   |
| O5—Gd1—O10 <sup>i</sup>                 | 113.8(3)  | O5—Gd1—O11 <sup>ii</sup>                 | 88.1(3)   |
| O10 <sup>i</sup> —Gd1—O1                | 75.5(8)   | O10 <sup>i</sup> —Gd1—O9 <sup>i</sup>    | 52.3(3)   |
| O11 <sup>ii</sup> —Gd1—O1               | 83.3(8)   | O11 <sup>ii</sup> —Gd1—O9 <sup>i</sup>   | 149.0(3)  |
| O11 <sup>ii</sup> —Gd1—O1W              | 77.6(4)   | O11 <sup>ii</sup> —Gd1—O10 <sup>i</sup>  | 156.5(3)  |
| O2W—Gd2—O3                              | 123.5(8)  | O2W—Gd2—O7 <sup>ii</sup>                 | 118.7(4)  |
| O2W—Gd2—O4                              | 74.6(6)   | O2W—Gd2—O8 <sup>ii</sup>                 | 77.0(4)   |
| O4—Gd2—O3                               | 51.7(9)   | O6 <sup>i</sup> —Gd2—O4                  | 87.3(6)   |
| O6 <sup>i</sup> —Gd2—O2W                | 82.1(4)   | O6 <sup>i</sup> —Gd2—O7 <sup>ii</sup>    | 152.1(4)  |
| O6 <sup>i</sup> —Gd2—O8 <sup>ii</sup>   | 154.4(4)  | O7 <sup>ii</sup> —Gd2—O3                 | 76.7(9)   |
| O6 <sup>i</sup> —Gd2—O12 <sup>iii</sup> | 90.7(3)   | O7 <sup>ii</sup> —Gd2—O4                 | 115.0(6)  |
| O8 <sup>ii</sup> —Gd2—O3                | 72.2(9)   | O12 <sup>iii</sup> —Gd2—O3               | 152.2(9)  |
| O8 <sup>ii</sup> —Gd2—O4                | 73.1(6)   | O12 <sup>iii</sup> —Gd2—O4               | 152.3(6)  |
| O8 <sup>ii</sup> —Gd2—O7 <sup>ii</sup>  | 53.5(3)   | O12 <sup>iii</sup> —Gd2—O7 <sup>ii</sup> | 77.1(3)   |
| O12 <sup>iii</sup> —Gd2—O2W             | 77.8(4)   | O12 <sup>iii</sup> —Gd2—O8 <sup>ii</sup> | 99.0(4)   |

<sup>b</sup>Symmetry codes: (i)  $x, y, z+1$ ; (ii)  $x+1, y, z+1$ ; (iii)  $x+1, y, z+2$ .

**Table S5.** Selected bond lengths (Å) and angles (°) for **JXUST-40b<sup>c</sup>**

|                                          |            |                                           |            |
|------------------------------------------|------------|-------------------------------------------|------------|
| Gd1—O8 <sup>ii</sup>                     | 2.416(4)   | Gd1—O14                                   | 2.260(6)   |
| Gd1—O11                                  | 2.114(5)   | Gd2—O2 <sup>iii</sup>                     | 2.307(4)   |
| Gd1—O12                                  | 2.390(5)   | Gd2—O3                                    | 2.438(4)   |
| O8 <sup>ii</sup> —Gd1—O7 <sup>ii</sup>   | 52.18(15)  | O14—Gd1—O5 <sup>i</sup>                   | 78.8(2)    |
| O11—Gd1—O5 <sup>i</sup>                  | 79.2(2)    | O14—Gd1—O7 <sup>ii</sup>                  | 122.2(2)   |
| O11—Gd1—O7 <sup>ii</sup>                 | 79.21(19)  | O14—Gd1—O8 <sup>ii</sup>                  | 81.7(2)    |
| O11—Gd1—O8 <sup>ii</sup>                 | 119.11(18) | O14—Gd1—O12                               | 74.4(2)    |
| O11—Gd1—O14                              | 157.9(2)   | O2 <sup>iii</sup> —Gd2—O4                 | 158.57(16) |
| O12—Gd1—O7 <sup>ii</sup>                 | 117.56(16) | O2 <sup>iii</sup> —Gd2—O6 <sup>ii</sup>   | 83.55(15)  |
| O12—Gd1—O8 <sup>ii</sup>                 | 76.88(17)  | O2 <sup>iii</sup> —Gd2—O9 <sup>iv</sup>   | 86.25(15)  |
| O10 <sup>iii</sup> —Gd2—O6 <sup>ii</sup> | 90.19(17)  | O4—Gd2—O3                                 | 53.65(15)  |
| O10 <sup>iii</sup> —Gd2—O9 <sup>iv</sup> | 86.64(16)  | O6 <sup>ii</sup> —Gd2—O3                  | 74.38(15)  |
| O10 <sup>iii</sup> —Gd2—O13              | 154.57(18) | O6 <sup>ii</sup> —Gd2—O4                  | 116.90(16) |
| O13—Gd2—O2 <sup>iii</sup>                | 75.52(18)  | O6 <sup>ii</sup> —Gd2—O9 <sup>iv</sup>    | 169.65(14) |
| O13—Gd2—O3                               | 81.75(18)  | O9 <sup>iv</sup> —Gd2—O3                  | 115.48(15) |
| O13—Gd2—O4                               | 105.58(19) | O9 <sup>iv</sup> —Gd2—O4                  | 73.05(15)  |
| O13—Gd2—O6 <sup>ii</sup>                 | 98.76(19)  | O10 <sup>iii</sup> —Gd2—O2 <sup>iii</sup> | 81.97(16)  |
| O13—Gd2—O9 <sup>iv</sup>                 | 80.31(18)  | O10 <sup>iii</sup> —Gd2—O3                | 123.65(17) |

<sup>c</sup>Symmetry codes: (i)  $x, y, z+1$ ; (ii)  $x-1, y, z+1$ ; (iii)  $x-1, y, z$ ; (iv)  $-x, -y+1, -z+1$ ;



**Table S6.** Selected bond lengths (Å) and angles (°) for **JXUST-41**<sup>d</sup>

|                                          |            |                                         |            |
|------------------------------------------|------------|-----------------------------------------|------------|
| Dy1—O2 <sup>i</sup>                      | 2.269(3)   | Dy1—O17                                 | 2.312(19)  |
| Dy1—O6 <sup>ii</sup>                     | 2.275(3)   | Dy2—O5                                  | 2.268(3)   |
| Dy1—O7                                   | 2.434(3)   | Dy2—O14                                 | 2.380(4)   |
| Dy1—O8                                   | 2.341(3)   | Dy1—O13                                 | 2.317(3)   |
| Dy1—O11 <sup>iii</sup>                   | 2.17(2)    | O2 <sup>i</sup> —Dy1—O6 <sup>ii</sup>   | 84.76(10)  |
| O11 <sup>iii</sup> —Dy1—O7               | 127.6(5)   | O2 <sup>i</sup> —Dy1—O7                 | 74.58(10)  |
| O11 <sup>iii</sup> —Dy1—O8               | 91.6(6)    | O2 <sup>i</sup> —Dy1—O8                 | 114.72(11) |
| O11 <sup>iii</sup> —Dy1—O13              | 152.4(5)   | O2 <sup>i</sup> —Dy1—O13                | 100.99(12) |
| O11 <sup>iii</sup> —Dy1—O17              | 7.8(10)    | O2 <sup>i</sup> —Dy1—O17                | 85.7(5)    |
| O13—Dy1—O7                               | 80.00(12)  | O6 <sup>ii</sup> —Dy1—O7                | 144.54(11) |
| O13—Dy1—O8                               | 106.23(12) | O6 <sup>ii</sup> —Dy1—O8                | 158.92(10) |
| O17—Dy1—O7                               | 120.0(5)   | O6 <sup>ii</sup> —Dy1—O13               | 75.99(12)  |
| O17—Dy1—O8                               | 87.5(5)    | O6 <sup>ii</sup> —Dy1—O17               | 86.0(5)    |
| O17—Dy1—O13                              | 160.0(5)   | O8—Dy1—O7                               | 54.28(10)  |
| O5—Dy2—O14                               | 85.25(14)  | O11 <sup>iii</sup> —Dy1—O2 <sup>i</sup> | 90.0(6)    |
| O11 <sup>iii</sup> —Dy1—O6 <sup>ii</sup> | 79.9(6)    |                                         |            |

<sup>d</sup>Symmetry codes: (i)  $x+1, y, z-1$ ; (ii)  $x+1, y, z$ ; (iii)  $-x+2, -y, -z+1$ .

**Table S7.** Selected bond lengths (Å) and angles (°) for **JXUST-41a<sup>e</sup>**

|                                        |           |                                          |           |
|----------------------------------------|-----------|------------------------------------------|-----------|
| Dy1—O2                                 | 2.255(9)  | Dy1—O5 <sup>i</sup>                      | 2.257(10) |
| Dy1—O2W                                | 2.340(15) | Dy1—O7 <sup>ii</sup>                     | 2.498(11) |
| Dy2—O1                                 | 2.193(10) | Dy1—O8 <sup>ii</sup>                     | 2.356(10) |
| Dy2—O1W                                | 2.222(9)  | Dy1—O9                                   | 2.33(3)   |
| Dy2—O3 <sup>iv</sup>                   | 2.431(10) | Dy1—O13 <sup>iii</sup>                   | 2.26(2)   |
| Dy2—O4 <sup>iv</sup>                   | 2.408(10) | O2—Dy1—O2W                               | 95.0(5)   |
| Dy2—O6 <sup>i</sup>                    | 2.217(9)  | O2—Dy1—O5 <sup>i</sup>                   | 87.6(4)   |
| Dy2—O11                                | 2.48(3)   | O2—Dy1—O7 <sup>ii</sup>                  | 73.3(4)   |
| O2—Dy1—O9                              | 87.7(7)   | O2—Dy1—O8 <sup>ii</sup>                  | 113.5(4)  |
| O2—Dy1—O13 <sup>iii</sup>              | 171.0(6)  | O2W—Dy1—O7 <sup>ii</sup>                 | 78.3(5)   |
| O5 <sup>i</sup> —Dy1—O2W               | 77.9(5)   | O2W—Dy1—O8 <sup>ii</sup>                 | 107.4(4)  |
| O5 <sup>i</sup> —Dy1—O9                | 85.7(7)   | O5 <sup>i</sup> —Dy1—O7 <sup>ii</sup>    | 147.9(4)  |
| O8 <sup>ii</sup> —Dy1—O7 <sup>ii</sup> | 52.9(4)   | O5 <sup>i</sup> —Dy1—O8 <sup>ii</sup>    | 157.1(4)  |
| O9—Dy1—O2W                             | 163.2(7)  | O9—Dy1—O7 <sup>ii</sup>                  | 118.2(7)  |
| O13 <sup>iii</sup> —Dy1—O2W            | 89.4(6)   | O9—Dy1—O8 <sup>ii</sup>                  | 86.5(7)   |
| O13 <sup>iii</sup> —Dy1—O9             | 85.9(8)   | O13 <sup>iii</sup> —Dy1—O5 <sup>i</sup>  | 85.6(6)   |
| O1—Dy2—O1W                             | 72.5(4)   | O13 <sup>iii</sup> —Dy1—O7 <sup>ii</sup> | 115.3(6)  |
| O1—Dy2—O3 <sup>iv</sup>                | 153.7(4)  | O13 <sup>iii</sup> —Dy1—O8 <sup>ii</sup> | 72.4(6)   |
| O1—Dy2—O4 <sup>iv</sup>                | 152.2(4)  | O1W—Dy2—O3 <sup>iv</sup>                 | 124.6(5)  |
| O1—Dy2—O6 <sup>i</sup>                 | 89.6(4)   | O1W—Dy2—O4 <sup>iv</sup>                 | 83.5(4)   |
| O1—Dy2—O11                             | 82.1(7)   | O1W—Dy2—O11                              | 153.0(7)  |
| O4 <sup>iv</sup> —Dy2—O3 <sup>iv</sup> | 53.7(4)   | O3 <sup>iv</sup> —Dy2—O11                | 76.5(7)   |
| O4 <sup>iv</sup> —Dy2—O11              | 123.4(7)  | O6 <sup>i</sup> —Dy2—O3 <sup>iv</sup>    | 76.7(4)   |
| O6 <sup>i</sup> —Dy2—O1W               | 77.5(5)   | O6 <sup>i</sup> —Dy2—O4 <sup>iv</sup>    | 98.7(4)   |
| O6 <sup>i</sup> —Dy2—O11               | 93.6(7)   |                                          |           |

<sup>e</sup>Symmetry codes: (i)  $x+1, y, z+1$ ; (ii)  $x, y, z+1$ ; (iii)  $x-1, y-1, z$ ; (iv)  $x+1, y, z$ .

**Table S8.** Selected bond lengths(Å) and angles(°) for **JXUST-41b<sup>f</sup>**

|                                          |            |                                        |            |
|------------------------------------------|------------|----------------------------------------|------------|
| Gd1—O8 <sup>i</sup>                      | 2.269(4)   | Gd2—O1 <sup>iii</sup>                  | 2.307(4)   |
| Gd1—O12 <sup>ii</sup>                    | 2.432(4)   | Gd2—O4                                 | 2.438(4)   |
| Gd1—O9                                   | 1.948(17)  | Gd2—O6                                 | 2.398(4)   |
| Gd1—O5                                   | 2.389(4)   | Gd2—O10 <sup>ii</sup>                  | 2.309(4)   |
| Gd1—O3                                   | 2.304(5)   | Gd2—O11                                | 2.182(4)   |
| Gd1—O13                                  | 2.261(6)   | O8 <sup>i</sup> —Gd1—O12 <sup>ii</sup> | 150.56(16) |
| O8 <sup>i</sup> —Gd1—O3                  | 84.62(16)  | O8 <sup>i</sup> —Gd1—O5                | 86.34(16)  |
| O9—Gd1—O8 <sup>i</sup>                   | 79.0(6)    | O5—Gd1—O12 <sup>ii</sup>               | 117.52(16) |
| O9—Gd1—O12 <sup>ii</sup>                 | 77.5(6)    | O3—Gd1—O12 <sup>ii</sup>               | 77.29(16)  |
| O9—Gd1—O5                                | 107.4(5)   | O3—Gd1—O5                              | 159.96(18) |
| O9—Gd1—O3                                | 88.4(5)    | O9—Gd1—O13                             | 157.6(6)   |
| O13—Gd1—O8 <sup>i</sup>                  | 78.9(2)    | O13—Gd1—O5                             | 74.4(2)    |
| O13—Gd1—O12 <sup>ii</sup>                | 122.2(2)   | O13—Gd1—O3                             | 86.3(2)    |
| O1 <sup>iii</sup> —Gd2—O4                | 145.46(15) | O6—Gd2—O4                              | 53.53(14)  |
| O1 <sup>iii</sup> —Gd2—O6                | 158.58(15) | O10 <sup>ii</sup> —Gd2—O4              | 74.43(14)  |
| O1 <sup>iii</sup> —Gd2—O10 <sup>ii</sup> | 83.58(14)  | O10 <sup>ii</sup> —Gd2—O6              | 116.87(15) |
| O11—Gd2—O1 <sup>iii</sup>                | 75.63(17)  | O11—Gd2—O6                             | 105.49(18) |
| O11—Gd2—O4                               | 81.69(17)  | O11—Gd2—O10 <sup>ii</sup>              | 98.73(18)  |

<sup>f</sup>Symmetry codes: (i)  $x+1, y, z-1$ ; (ii)  $x+1, y, z$ ; (iii)  $x-1, y+1, z$ .

**Table S9.** SHAPE analysis of the Gd<sup>III</sup> ions in **JXUST-40**

| Ions | Label         | Shape                                   | Symmetry                   | Distortion ( $\tau$ ) |
|------|---------------|-----------------------------------------|----------------------------|-----------------------|
| Gd1  | HP-7          | Heptagon                                | $D_{7h}$                   | 29.478                |
|      | HPY-7         | Hexagonal pyramid                       | $C_{6v}$                   | 19.495                |
|      | PBPY-7        | Pentagonal bipyramid                    | $D_{5h}$                   | 5.023                 |
|      | COC-7         | Capped octahedron                       | $C_{3v}$                   | 2.510                 |
|      | <b>CTPR-7</b> | <b>Capped trigonal prism</b>            | <b><math>C_{2v}</math></b> | <b>1.858</b>          |
|      | JPBPY-7       | Johnson pentagonal bipyramid J13        | $D_{5h}$                   | 8.322                 |
|      | JETPY-7       | Johnson elongated triangular pyramid J7 | $C_{3v}$                   | 16.540                |
| Gd2  | HP-7          | Heptagon                                | $D_{7h}$                   | 33.217                |
|      | HPY-7         | Hexagonal pyramid                       | $C_{6v}$                   | 19.430                |
|      | PBPY-7        | Pentagonal bipyramid                    | $D_{5h}$                   | 6.190                 |
|      | <b>COC-7</b>  | <b>Capped octahedron</b>                | <b><math>C_{3v}</math></b> | <b>1.988</b>          |
|      | <b>CTPR-7</b> | <b>Capped trigonal prism</b>            | <b><math>C_{2v}</math></b> | <b>1.794</b>          |
|      | JPBPY-7       | Johnson pentagonal bipyramid J13        | $D_{5h}$                   | 9.400                 |
|      | JETPY-7       | Johnson elongated triangular pyramid J7 | $C_{3v}$                   | 18.228                |

**Table S10.** SHAPE analysis of the Gd<sup>III</sup> ions in **JXUST-40a**

| ions | label         | Shape                                      | symmetry                   | distortion( $\tau$ ) |
|------|---------------|--------------------------------------------|----------------------------|----------------------|
| Gd1  | HP-7          | Heptagon                                   | $D_{7h}$                   | 31.882               |
|      | HPY-7         | Hexagonal pyramid                          | $C_{6v}$                   | 20.265               |
|      | PBPY-7        | Pentagonal bipyramid                       | $D_{5h}$                   | 6.091                |
|      | COC-7         | Capped octahedron                          | $C_{3v}$                   | 2.508                |
|      | <b>CTPR-7</b> | <b>Capped trigonal prism</b>               | <b><math>C_{2v}</math></b> | <b>1.501</b>         |
|      | JPBPY-7       | Johnson pentagonal bipyramid J13           | $D_{5h}$                   | 9.392                |
|      | JETPY-7       | Johnson elongated triangular pyramid J7    | $C_{3v}$                   | 17.531               |
| Gd2  | OP-8          | Octagon                                    | $D_{8h}$                   | 33.514               |
|      | HPY-8         | Heptagonal pyramid                         | $C_{7v}$                   | 21.895               |
|      | HBPY-8        | Hexagonal bipyramid                        | $D_{6h}$                   | 15.247               |
|      | CU-8          | Cube                                       | $O_h$                      | 10.301               |
|      | <b>SAPR-8</b> | <b>Square antiprism</b>                    | <b><math>D_{4d}</math></b> | <b>2.340</b>         |
|      | TDD-8         | Triangular dodecahedron                    | $D_{2d}$                   | 3.084                |
|      | JGBF-8        | Johnson gyrobifastigium J26                | $D_{2d}$                   | 14.003               |
|      | JETBPY-8      | Johnson elongated triangular bipyramid J14 | $D_{3h}$                   | 28.586               |

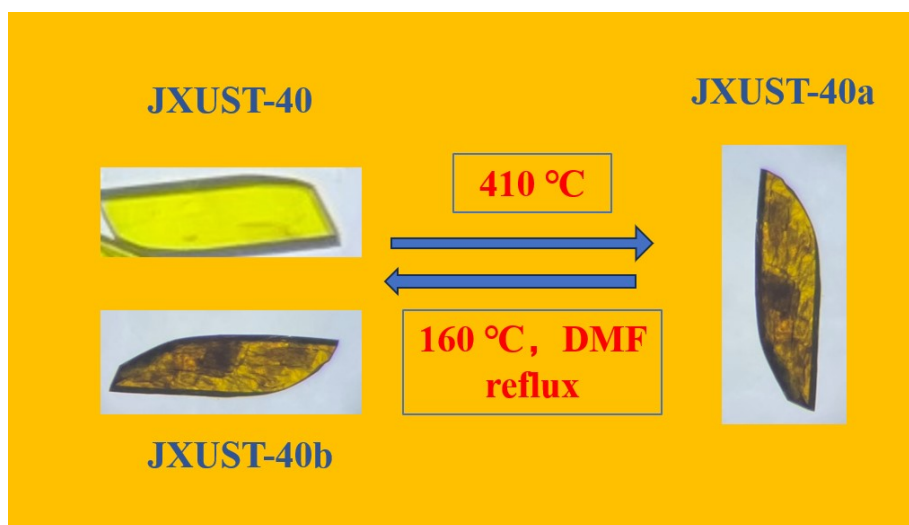

**Fig. S1** Schematic diagram of the reversible transformation of **JXUST-40**, **JXUST-40a** and **JXUST-40b**

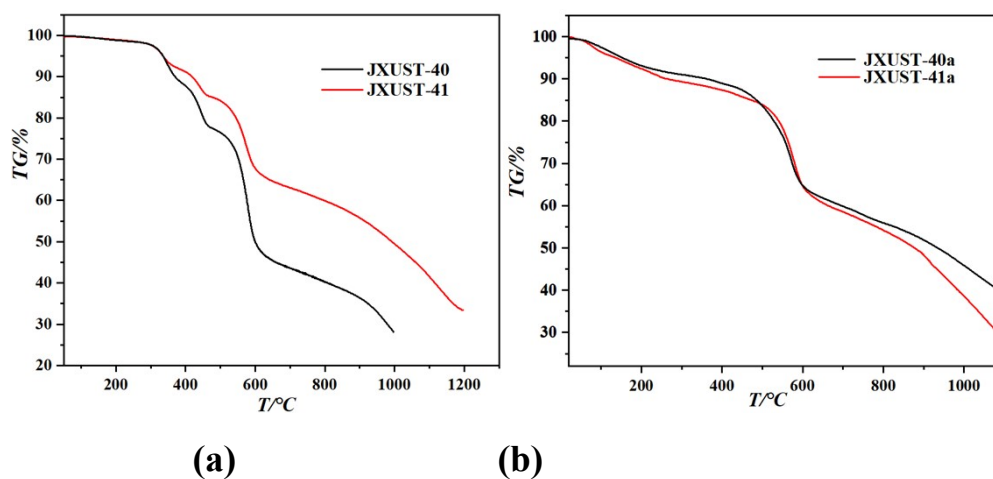

**Fig. S2** (a) The TGA curves for **JXUST-40** and **JXUST-41**; (b) The TGA curves for **JXUST-40a** and **JXUST-41a**.

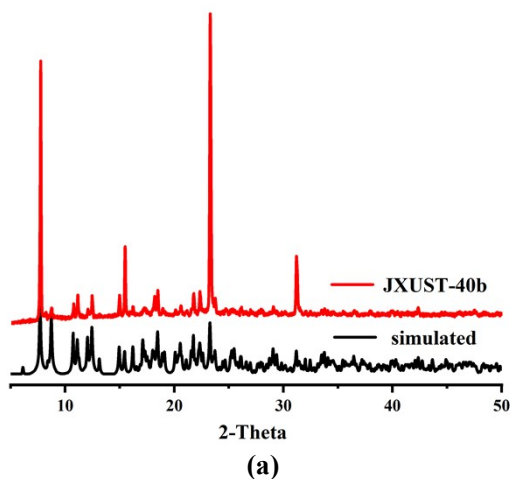

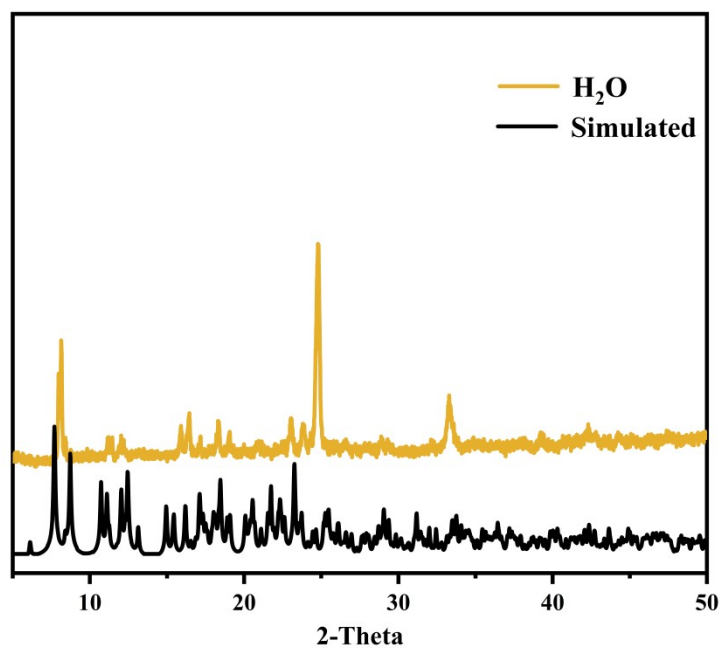

(b)

**Fig. S3** (a) The simulated and experimental PXRD patterns of **JXUST-40b**; (b) the simulated and experimental PXRD patterns of **JXUST-40** soaked in aqueous solution for 24 h.

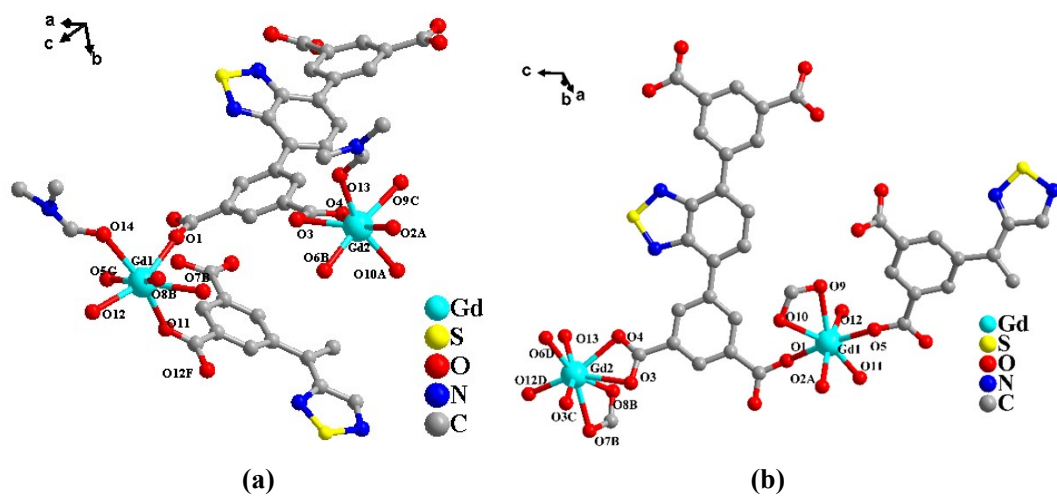

**Fig. S4** (a) Ball-and-stick view of the coordination environments of  $\text{Gd}^{\text{III}}$  in **JXUST-40** (symmetry codes: A:  $x, y, z+1$ ; B:  $x-1, y, z+1$ ; C:  $-x, -y+1, -z+2$ ; D:  $x-1, y, z$ ); (b) Ball-and-stick view of the coordination environments of  $\text{Gd}^{\text{III}}$  in **JXUST-40a** (symmetry codes: A:  $-x+1, -y+1, -z+2$ ; B:  $-x+1, -y+1, -z+3$ ; C:  $x, y, z+1$ ; D:  $x+1, y, z+1$ ).

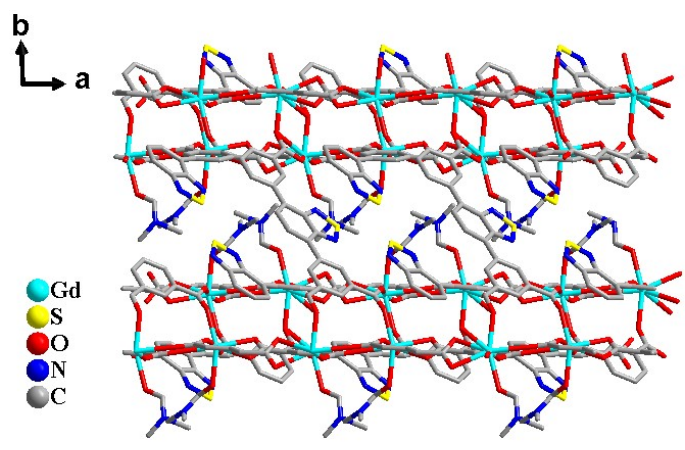

**Fig. S5** View of the 3D structure of **JXUST-40** along the *c* axis.

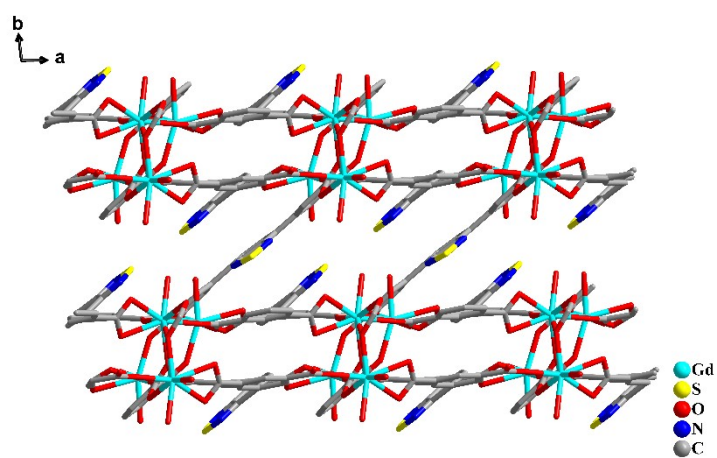

**Fig. S6** View of the 3D structure of **JXUST-40a** along the *c* axis

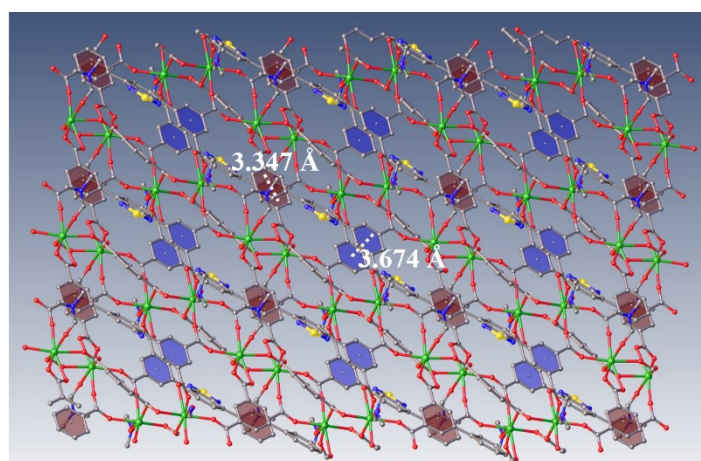

**(a)**



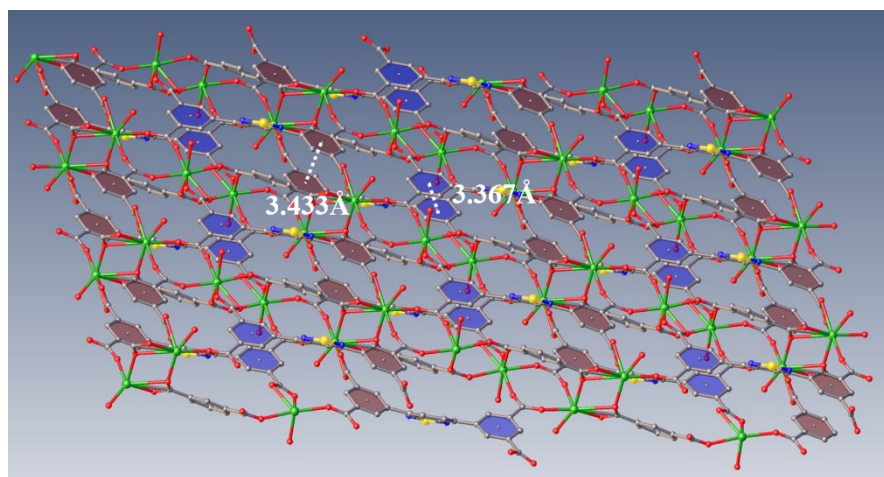

(b)

Fig. S7 The  $\pi$ - $\pi$  stacking structures of (a) JXUST-40 and (b) JXUST-40a.

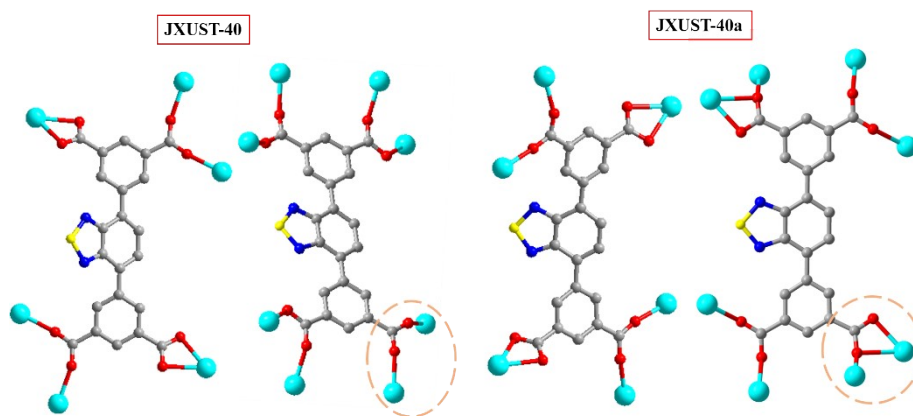

Fig. S8 The coordination modes of BTDI<sup>4+</sup> ligands in JXUST-40 and JXUST-40a.

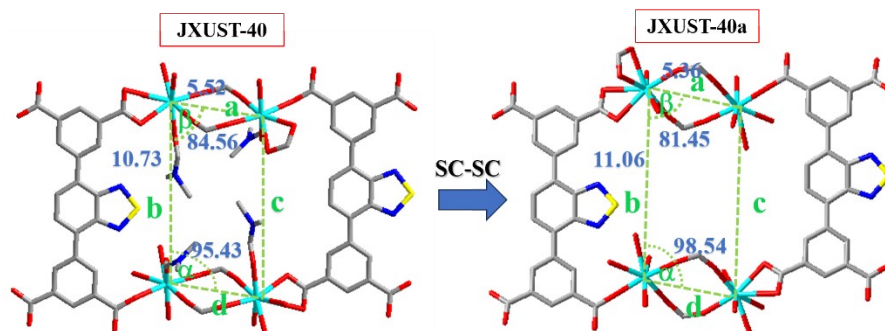

Fig. S9 Variation in bond lengths and angles of the edges of a parallelogram for JXUST-40 and JXUST-40a.

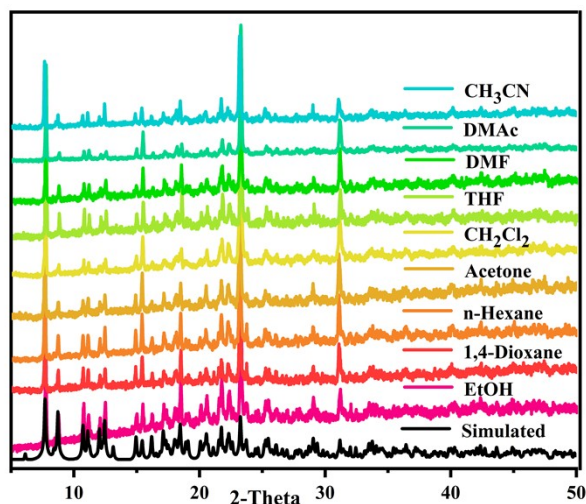

Fig. S10 The experimental PXRD patterns of JXUST-40 soaked in common solvents.

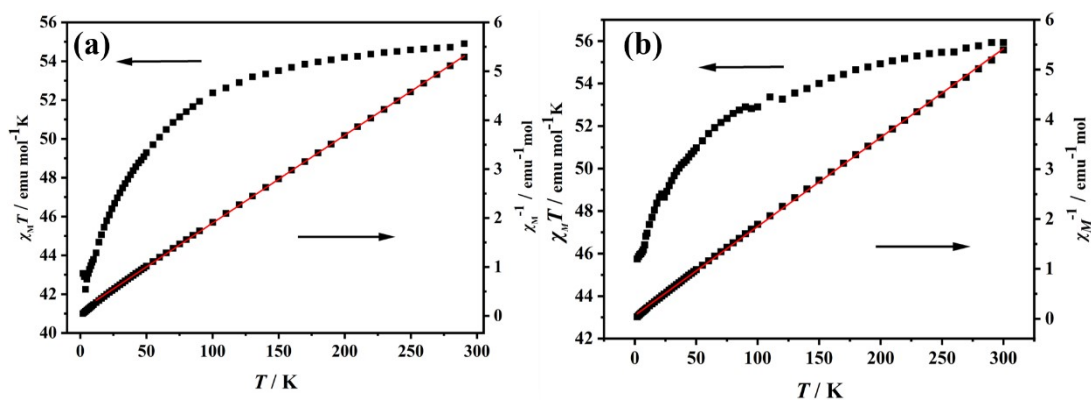

Fig. S11 Temperature dependencies of the magnetic susceptibility product ( $\chi_M T$ ) at 2–300 K with a dc field of 1 kOe for (a) JXUST-41 and (b) JXUST-41a.

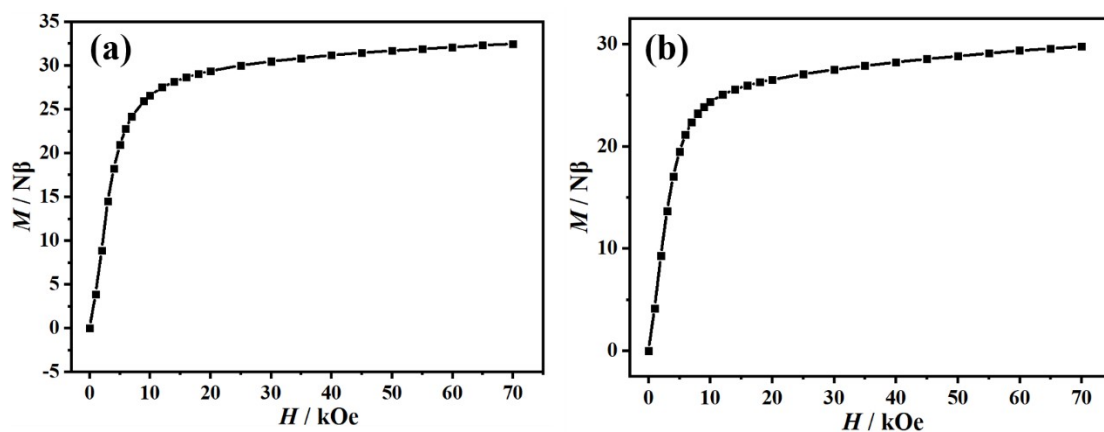

Fig. S12 The  $M$ – $H$  plots at 2 K for (a) JXUST-41 and (b) JXUST-41a.

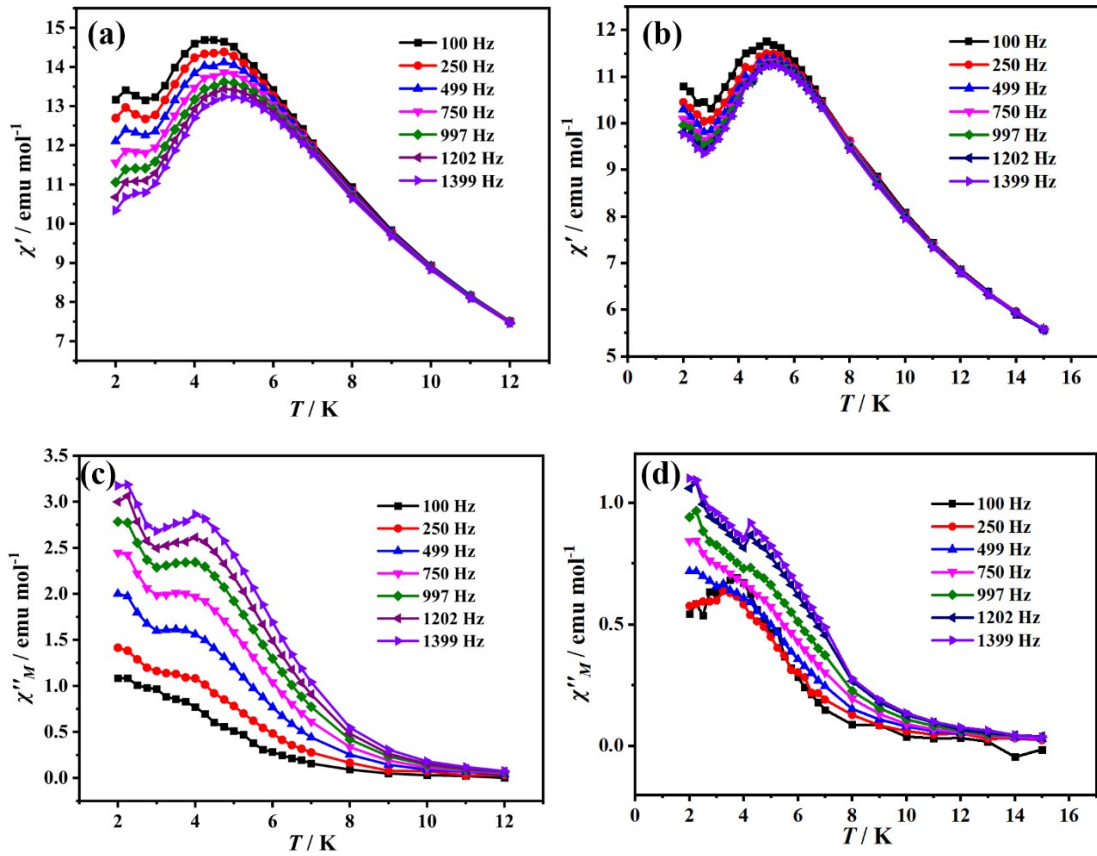

**Fig. S13** Temperature dependence of the in-phase ( $\chi'$ ) and out-of-phase ( $\chi''$ ) ac susceptibilities measured at varying frequencies under 2 kOe dc field for (a, c) **JXUST-41** and (b, d) **JXUST-41a**.
